# Supplementary material
Source: HighWire-hosted journal article supplement (https://clincancerres.aacrjournals.org/content/suppl/2009/03/13/1078-0432.CCR-08-0716)
Supplement: Supplementary_Tables_S1-S4.pdf [file Supplementary_Tables_S1-S4.pdf]

**Supplementary Table 1 – Genotype Frequencies in Cases and Controls**

| <b>Polymorphism</b> | <b>MAF</b> | <b>Cancer Set</b> | <b>Controls Common</b> | <b>Controls Heterozygote</b> | <b>Controls Rare</b> | <b>Cases Common</b> | <b>Cases Heterozygote</b> | <b>Cases Rare</b> |
|---------------------|------------|-------------------|------------------------|------------------------------|----------------------|---------------------|---------------------------|-------------------|
| <b>PTGS1</b>        |            |                   |                        |                              |                      |                     |                           |                   |
| rs1330344 (01)      | 0.21       | Set 1             | 1413                   | 748                          | 112                  | 1395                | 683                       | 112               |
| rs10306122 (04)     | 0.07       | Set 1             | 1969                   | 285                          | 10                   | 1902                | 271                       | 9                 |
| rs10306194 (05)     | 0.16       | Set 1             | 1594                   | 610                          | 53                   | 1578                | 543                       | 49                |
| rs4836887 (07)      | 0.13       | Set 1             | 1702                   | 543                          | 33                   | 1665                | 492                       | 31                |
| rs10306108 (08)     | 0.07       | Set 1             | 1952                   | 306                          | 13                   | 1867                | 302                       | 12                |
| rs10306146 (15)     | 0.13       | Set 1             | 1699                   | 529                          | 28                   | 1670                | 477                       | 27                |
| <b>PTGS2</b>        |            |                   |                        |                              |                      |                     |                           |                   |
| rs4648310 (01)      | 0.04       | Set 1             | 2119                   | 153                          | 4                    | 2062                | 119                       | 4                 |
| rs689467 (02)       | 0.07       | Set 1             | 1978                   | 293                          | 9                    | 1881                | 303                       | 11                |
| rs2206593 (03)      | 0.05       | Set 1             | 2042                   | 222                          | 6                    | 1950                | 222                       | 13                |
| rs5275 (04)         | 0.34       | Set 1             | 996                    | 1010                         | 259                  | 927                 | 985                       | 260               |
| *rs5277 (09)        | 0.16       | Set 1             | 1562                   | 639                          | 56                   | 1573                | 550                       | 51                |
| *rs5277 (09)        | 0.16       | Set 2             | 1570                   | 624                          | 42                   | 1469                | 619                       | 57                |
| *rs5277 (09)        | 0.16       | Set 1 / 2         | 3132                   | 1263                         | 98                   | 3042                | 1169                      | 108               |
| rs20424 (11)        | 0.02       | Set 1             | 2183                   | 91                           | 0                    | 2118                | 74                        | 0                 |
| rs4648276 (17)      | 0.12       | Set 1             | 1732                   | 489                          | 35                   | 1667                | 463                       | 39                |
| <b>PTGIS</b>        |            |                   |                        |                              |                      |                     |                           |                   |
| rs6090990 (03)      | 0.25       | Set 1             | 1261                   | 841                          | 139                  | 1205                | 819                       | 140               |
| *rs5602 (04)        | 0.49       | Set 1             | 510                    | 1157                         | 570                  | 550                 | 1022                      | 579               |
| *rs5602 (04)        | 0.49       | Set 2             | 530                    | 1107                         | 598                  | 556                 | 1055                      | 514               |
| *rs5602 (04)        | 0.49       | Set 1 / 2         | 1040                   | 2264                         | 1168                 | 1106                | 2077                      | 1093              |
| *rs6090996 (05)     | 0.21       | Set 1             | 1410                   | 770                          | 90                   | 1441                | 639                       | 99                |
| *rs6090996 (05)     | 0.21       | Set 2             | 1446                   | 732                          | 94                   | 1382                | 705                       | 91                |
| *rs6090996 (05)     | 0.21       | Set 1 / 2         | 2856                   | 1502                         | 184                  | 2823                | 1344                      | 190               |
| rs508757 (06)       | 0.20       | Set 1             | 1467                   | 711                          | 89                   | 1417                | 659                       | 95                |
| rs707528 (08)       | 0.49       | Set 1             | 572                    | 1159                         | 537                  | 561                 | 1055                      | 559               |
| *rs477627 (11)      | 0.16       | Set 1             | 1612                   | 592                          | 68                   | 1549                | 596                       | 40                |
| *rs477627 (11)      | 0.16       | Set 2             | 1636                   | 569                          | 69                   | 1571                | 557                       | 47                |
| *rs477627 (11)      | 0.16       | Set 1 / 2         | 3248                   | 1161                         | 137                  | 3120                | 1153                      | 87                |

| Polymorphism     | MAF  | Cancer Set | Controls Common | Controls Heterozygote | Controls Rare | Cases Common | Cases Heterozygote | Cases Rare |
|------------------|------|------------|-----------------|-----------------------|---------------|--------------|--------------------|------------|
| <b>PTGIS</b>     |      |            |                 |                       |               |              |                    |            |
| rs693649 (12)    | 0.20 | Set 1      | 1440            | 741                   | 91            | 1428         | 675                | 79         |
| rs6012696 (13)   | 0.07 | Set 1      | 1969            | 299                   | 10            | 1876         | 305                | 11         |
| *rs556731 (14)   | 0.05 | Set 1      | 2046            | 218                   | 6             | 2020         | 160                | 3          |
| *rs556731 (14)   | 0.05 | Set 2      | 2077            | 190                   | 5             | 1958         | 201                | 10         |
| *rs556731 (14)   | 0.05 | Set 1 / 2  | 4123            | 408                   | 11            | 3978         | 361                | 13         |
| rs6095543 (15)   | 0.16 | Set 1      | 1590            | 619                   | 55            | 1501         | 611                | 71         |
| rs1393343 (16)   | 0.22 | Set 1      | 1373            | 799                   | 103           | 1365         | 705                | 117        |
| rs574113 (17)    | 0.34 | Set 1      | 998             | 1008                  | 271           | 968          | 949                | 273        |
| rs501908 (18)    | 0.10 | Set 1      | 1831            | 417                   | 29            | 1736         | 425                | 27         |
| *rs8183919 (19)  | 0.29 | Set 1      | 1131            | 960                   | 185           | 1068         | 894                | 223        |
| *rs8183919 (19)  | 0.29 | Set 2      | 1141            | 948                   | 188           | 1057         | 909                | 206        |
| *rs8183919 (19)  | 0.29 | Set 1 / 2  | 2272            | 1908                  | 373           | 2125         | 1803               | 429        |
| rs1066894 (20)   | 0.31 | Set 1      | 1087            | 951                   | 228           | 1092         | 871                | 2181       |
| rs476496 (21)    | 0.24 | Set 1      | 1306            | 794                   | 127           | 1269         | 769                | 127        |
| <b>PTGES</b>     |      |            |                 |                       |               |              |                    |            |
| rs2302821 (03)   | 0.08 | Set 1      | 1902            | 353                   | 12            | 1872         | 298                | 14         |
| rs4837404 (04)   | 0.35 | Set 1      | 957             | 1029                  | 277           | 928          | 976                | 274        |
| rs10739757 (05)  | 0.10 | Set 1      | 1808            | 436                   | 17            | 1710         | 435                | 26         |
| *rs10448290 (06) | 0.09 | Set 1      | 1888            | 375                   | 9             | 1795         | 355                | 25         |
| *rs10448290 (06) | 0.09 | Set 2      | 1906            | 349                   | 17            | 1810         | 343                | 19         |
| *rs10448290 (06) | 0.09 | Set 1 / 2  | 3794            | 724                   | 26            | 3605         | 698                | 44         |
| rs12553596 (13)  | 0.07 | Set 1      | 1940            | 306                   | 6             | 1859         | 300                | 17         |
| <b>PTGDS</b>     |      |            |                 |                       |               |              |                    |            |
| rs11787588 (01)  | 0.27 | Set 1      | 1213            | 885                   | 166           | 1211         | 820                | 144        |
| rs10781530 (03)  | 0.31 | Set 1      | 1531            | 684                   | 56            | 1478         | 631                | 74         |
| rs908839 (04)    | 0.47 | Set 1      | 634             | 1135                  | 493           | 594          | 1080               | 499        |
| <b>PGDS</b>      |      |            |                 |                       |               |              |                    |            |
| rs10516950 (02)  | 0.44 | Set 1      | 709             | 1136                  | 433           | 673          | 1082               | 432        |
| rs1045435 (03)   | 0.39 | Set 1      | 841             | 1068                  | 359           | 862          | 993                | 326        |

| Polymorphism    | MAF  | Cancer Set | Controls Common | Controls Heterozygote | Controls Rare | Cases Common | Cases Heterozygote | Cases Rare |
|-----------------|------|------------|-----------------|-----------------------|---------------|--------------|--------------------|------------|
| <b>TBXAS1</b>   |      |            |                 |                       |               |              |                    |            |
| rs6971207 (01)  | 0.01 | Set 1      | 2228            | 50                    | 0             | 2127         | 59                 | 2          |
| rs2267681(02)   | 0.42 | Set 1      | 771             | 1084                  | 404           | 764          | 1044               | 367        |
| rs7810415 (03)  | 0.48 | Set 1      | 573             | 1172                  | 503           | 558          | 1074               | 534        |
| rs3779134 (04)  | 0.12 | Set 1      | 1771            | 467                   | 37            | 1680         | 466                | 37         |
| rs194149 (05)   | 0.28 | Set 1      | 1187            | 884                   | 194           | 1131         | 872                | 172        |
| rs11973494 (08) | 0.22 | Set 1      | 1385            | 765                   | 120           | 1383         | 688                | 112        |
| rs2284205 (09)  | 0.16 | Set 1      | 1615            | 595                   | 64            | 1545         | 587                | 53         |
| rs2107901 (11)  | 0.17 | Set 1      | 1578            | 622                   | 64            | 1528         | 566                | 67         |
| rs10487665 (12) | 0.09 | Set 1      | 1878            | 381                   | 15            | 1821         | 355                | 16         |
| rs2190087 (13)  | 0.23 | Set 1      | 1325            | 821                   | 117           | 1255         | 806                | 114        |
| rs1557967 (14)  | 0.2  | Set 1      | 1455            | 733                   | 85            | 1397         | 698                | 92         |
| rs1003816 (15)  | 0.1  | Set 1      | 1827            | 415                   | 20            | 1741         | 400                | 36         |
| rs41728 (16)    | 0.12 | Set 1      | 1749            | 493                   | 26            | 1675         | 459                | 44         |
| *rs41727 (17)   | 0.1  | Set 1      | 1846            | 413                   | 9             | 1767         | 378                | 32         |
| *rs41727 (17)   | 0.1  | Set 2      | 1881            | 367                   | 29            | 1765         | 370                | 34         |
| *rs41727 (17)   | 0.1  | Set 1 / 2  | 3727            | 780                   | 38            | 3532         | 748                | 66         |
| rs2267701 (20)  | 0.14 | Set 1      | 1669            | 548                   | 31            | 1602         | 520                | 47         |
| rs740150 (21)   | 0.19 | Set 1      | 1507            | 674                   | 93            | 1411         | 697                | 77         |
| rs10487667 (23) | 0.25 | Set 1      | 1280            | 832                   | 160           | 1170         | 852                | 154        |
| rs2267706 (25)  | 0.23 | Set 1      | 1358            | 782                   | 118           | 1269         | 781                | 118        |
| rs22861987 (28) | 0.38 | Set 1      | 880             | 1054                  | 319           | 785          | 1064               | 317        |
| rs2286196 (29)  | 0.19 | Set 1      | 1474            | 704                   | 89            | 1397         | 708                | 72         |
| rs2267692 (30)  | 0.35 | Set 1      | 964             | 1011                  | 292           | 906          | 968                | 295        |
| rs1015572 (31)  | 0.05 | Set 1      | 2047            | 204                   | 8             | 1978         | 198                | 4          |
| rs1015570 (32)  | 0.39 | Set 1      | 859             | 1040                  | 361           | 786          | 1036               | 340        |
| rs2299887 (37)  | 0.4  | Set 1      | 838             | 1043                  | 375           | 792          | 1026               | 355        |
| rs10544451 (38) | 0.24 | Set 1      | 1301            | 826                   | 120           | 1230         | 799                | 121        |

\*SNP completed in Set 1 and Set 2

**Supplementary Table 2 - Per Allele Risk for Multimarker Tags**

| Gene <sup>a</sup> | Multimarker TagSNPs                                    | Haplotype <sup>*</sup>            | Frequency | P-value | OR   | 95% CIs   |
|-------------------|--------------------------------------------------------|-----------------------------------|-----------|---------|------|-----------|
| <b>TBXAS1</b>     | rs 2267681 (02); rs 7810415 (03) CC                    | h00                               | 0.45      | 0.83    | 0.99 | 0.91-1.08 |
|                   | rs 2267681 (02); rs 7810415 (03) TC                    | h10                               | 0.07      | 0.12    | 0.99 | 0.91-1.08 |
|                   | rs 2299887 (37); rs 194149 (05) GG                     | h00                               | 0.57      | 0.85    | 0.99 | 0.91-1.08 |
|                   | rs 194149 (05); rs 11973494 (08) AA                    | h11                               | 0.14      | 0.42    | 0.95 | 0.84-1.08 |
|                   | rs2299887 (37); rs1015570 (32);<br>rs2267692 (30) ACA  | h110                              | 0.12      | 0.73    | 0.98 | 0.86-1.11 |
|                   | rs1015570 (32); rs11973494 (08);<br>rs2284205 (09) GAA | h011                              | 0.06      | 0.62    | 0.95 | 0.78-1.16 |
|                   | rs 10487665 (12); rs 1557967 (14)<br>AG                | h00                               | 0.8       | 0.6     | 0.97 | 0.88-1.08 |
|                   | <b>PTGDS</b>                                           | rs908839 (04); rs10781530 (03) GC | h11       | 0.03    | 0.98 | 1.11      |

<sup>\*</sup>0 = common allele

1 = rare allele

**Supplementary Table 3 – Meta-analysis of Langsenlehner, Cox and Abraham studies**

**Heterozygote Risk**

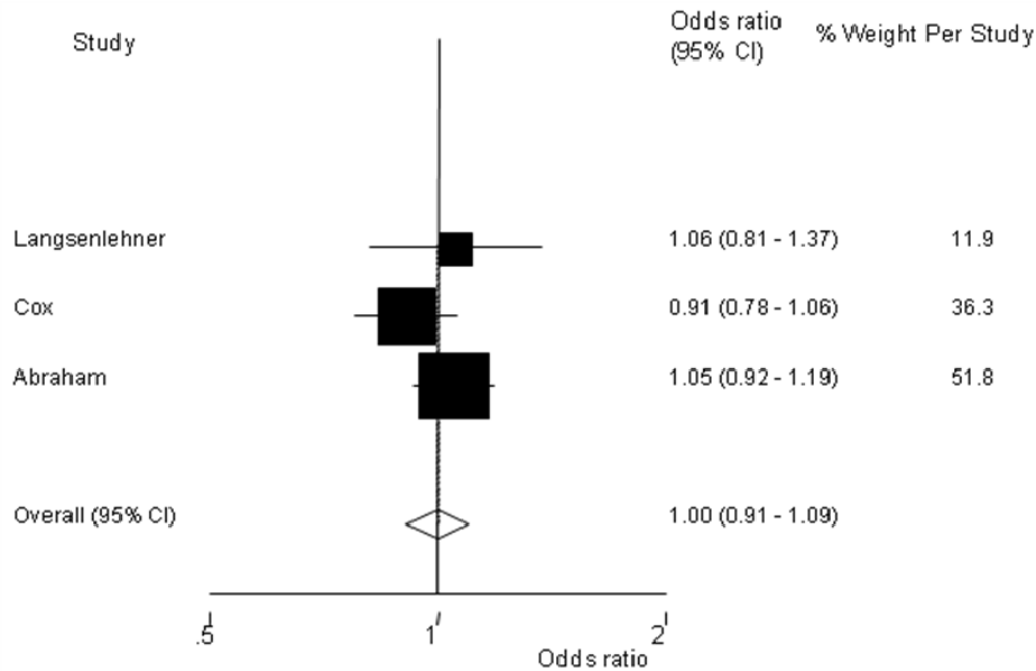

Heterogeneity Chi-squared = 2.23 (d.f. = 2) p=0.33; Test of OR = 1; z = 0.05 p = 0.96

**\*Homozygote Risk**

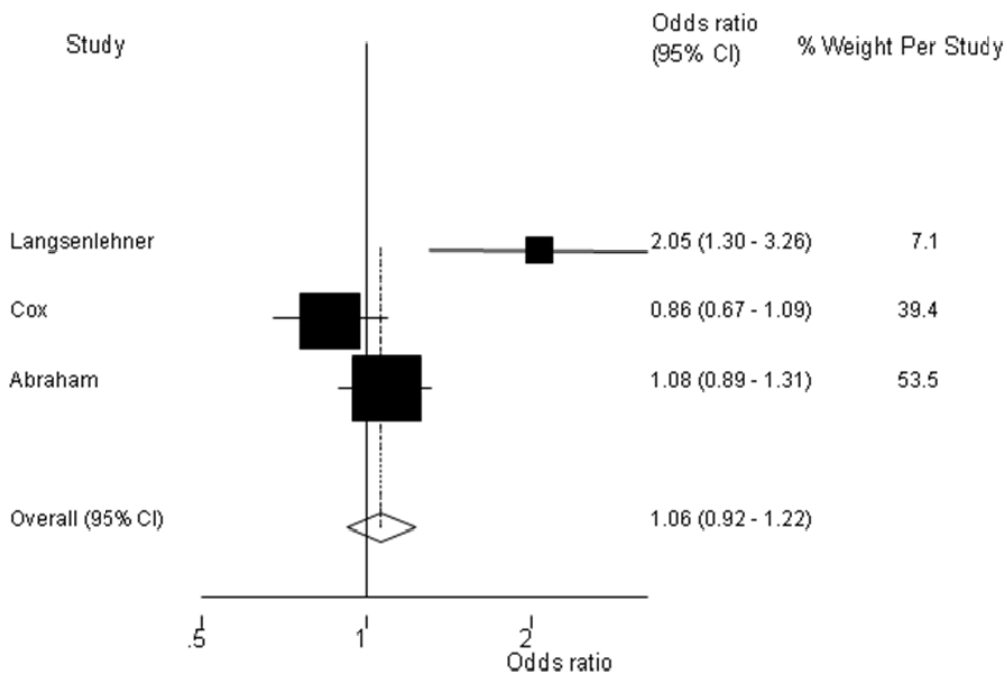

Heterogeneity Chi-squared = 10.99 (d.f. = 2) p=0.004; Test of OR = 1; z = 0.80 p = 0.42

\*The difference in our estimates and those of the Cox paper can be explained by the fact that Cox et al presented multivariate adjusted ORs.

### Per Allele Risk

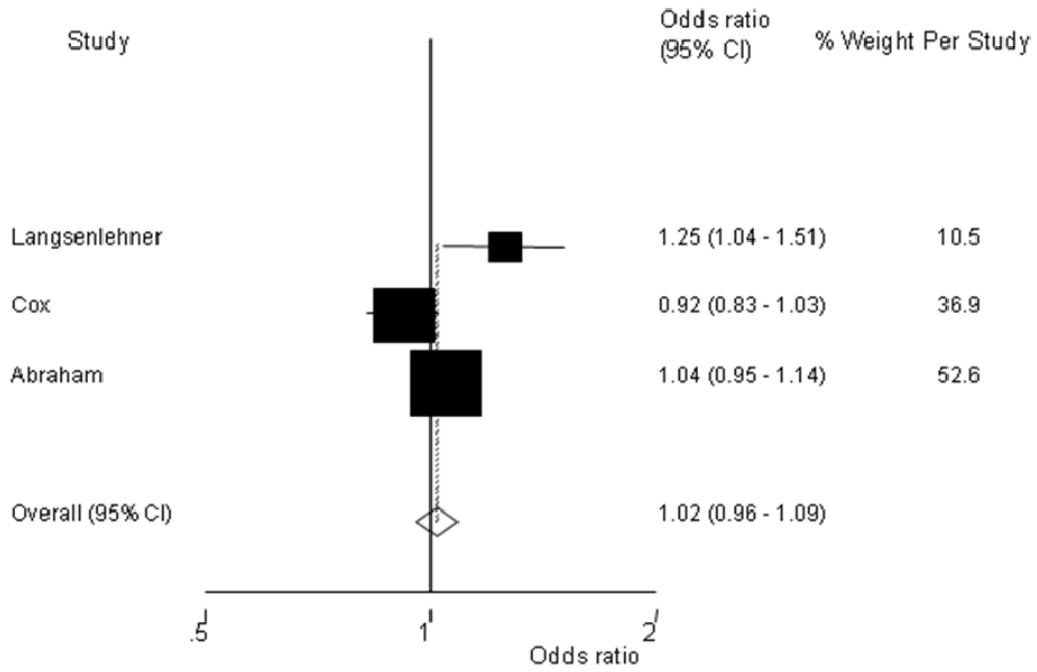

Heterogeneity Chi-squared = 8.31 (d.f. = 2) p=0.02; Test of OR = 1; z = 0.58 p = 0.56

**Supplementary Table 4: Prostaglandin TagSNP Incident Cases and Prevalent Cases Survival Analysis**

| †Gene/SNP                                   | MAF** | INCIDENT CASES |                              |             | PREVALENT CASES |                              |             |
|---------------------------------------------|-------|----------------|------------------------------|-------------|-----------------|------------------------------|-------------|
|                                             |       | P-trend        | Hazard ratio (HR) Per Allele | 95% CI**    | P-trend         | Hazard ratio (HR) Per Allele | 95% CI**    |
| PTGDS                                       |       |                |                              |             |                 |                              |             |
| PTGDS(01) rs11787588                        | 0.27  | 0.40           | 1.09                         | 0.89 - 1.34 | 0.26            | 0.83                         | 0.60 - 1.15 |
| PTGDS(03) rs10781530                        | 0.31  | 0.44           | 0.93                         | 0.76 - 1.13 | 0.01            | 1.47                         | 1.11 - 1.95 |
| PTGDS(04) rs908839                          | 0.47  | 1.00           | 1.00                         | 0.84 - 1.20 | 0.47            | 0.9                          | 0.68 - 1.19 |
| PTGES                                       |       |                |                              |             |                 |                              |             |
| PTGES(03) rs2302821                         | 0.08  | 0.27           | 1.20                         | 0.88 - 1.64 | 0.13            | 1.48                         | 0.91 - 2.39 |
| PTGES(04) rs4837404                         | 0.35  | 0.53           | 1.06                         | 0.88 - 1.28 | 0.03            | 0.73                         | 0.54 - 0.98 |
| PTGES(05) rs10739757                        | 0.1   | 0.05           | 0.75                         | 0.55 - 1.02 | 0.32            | 1.24                         | 0.82 - 1.89 |
| PTGES (06) rs10448290                       | 0.09  | 0.01           | 0.66                         | 0.47 - 0.94 | 0.71            | 1.1                          | 0.68 - 1.76 |
| ††PTGES(13) rs12553596 (set 1 & 2 combined) | 0.07  | 0.01           | 0.71                         | 0.54 - 0.95 | 0.61            | 1.11                         | 0.75 - 1.65 |
| PTGIS                                       |       |                |                              |             |                 |                              |             |
| PTGIS(03) rs6090990                         | 0.25  | 0.76           | 0.97                         | 0.79 - 1.19 | 0.86            | 0.97                         | 0.70 - 1.34 |
| PTGIS(04) rs5602                            | 0.49  | 0.76           | 1.03                         | 0.86 - 1.22 | 0.4             | 0.89                         | 0.67 - 1.17 |
| PTGIS(05) rs6090996                         | 0.21  | 0.93           | 1.01                         | 0.82 - 1.25 | 0.15            | 0.75                         | 0.50 - 1.12 |
| PTGIS(06) rs508757                          | 0.2   | 0.13           | 1.17                         | 0.96 - 1.44 | 0.63            | 0.91                         | 0.62 - 1.34 |
| PTGIS(08) rs707528                          | 0.49  | 0.30           | 0.91                         | 0.77 - 1.09 | 0.06            | 1.31                         | 0.99 - 1.74 |
| PTGIS(11) rs477627                          | 0.16  | 0.23           | 1.16                         | 0.91 - 1.48 | 0.51            | 0.88                         | 0.59 - 1.31 |
| PTGIS(12) rs693649                          | 0.2   | 0.67           | 0.95                         | 0.76 - 1.20 | 0.02            | 1.49                         | 1.07 - 2.06 |
| PTGIS(13) rs6012696                         | 0.07  | 0.69           | 1.07                         | 0.77 - 1.50 | 0.61            | 1.11                         | 0.75 - 1.65 |
| PTGIS(14) rs556731                          | 0.05  | 0.32           | 0.77                         | 0.45 - 1.32 | 0.38            | 0.72                         | 0.33 - 1.58 |
| PTGIS(15) rs6095543                         | 0.16  | 0.55           | 0.93                         | 0.73 - 1.18 | 0.85            | 1.04                         | 0.73 - 1.48 |
| PTGIS (16) rs1393343                        | 0.22  | 0.20           | 1.14                         | 0.93 - 1.39 | 0.96            | 0.99                         | 0.70 - 1.41 |
| PTGIS (17) rs574113                         | 0.34  | 0.98           | 1.00                         | 0.84 - 1.20 | 0.07            | 1.3                          | 0.99 - 1.71 |
| PTGIS (18) rs501908                         | 0.1   | 0.21           | 1.19                         | 0.92 - 1.54 | 0.50            | 0.85                         | 0.52 - 1.39 |
| PTGIS (19) rs8183919                        | 0.29  | 0.37           | 0.92                         | 0.76 - 1.11 | 0.1             | 1.28                         | 0.96 - 1.70 |
| PTGIS (20) rs1066894                        | 0.31  | 0.49           | 1.07                         | 0.89 - 1.30 | 0.57            | 0.92                         | 0.69 - 1.23 |
| PTGIS (21) rs476496                         | 0.24  | 0.67           | 1.05                         | 0.85 - 1.29 | 0.93            | 0.99                         | 0.71 - 1.37 |
| PTGS1                                       |       |                |                              |             |                 |                              |             |
| PTGS1(01) rs1330344                         | 0.21  | 0.71           | 1.04                         | 0.85 - 1.28 | 0.25            | 1.21                         | 0.88 - 1.66 |
| PTGS1(04) rs10306122                        | 0.07  | 0.31           | 0.83                         | 0.57 - 1.21 | 0.40            | 0.76                         | 0.40 - 1.47 |
| PTGS1(05) rs10306194                        | 0.16  | 0.75           | 0.96                         | 0.75 - 1.24 | 0.86            | 0.96                         | 0.64 - 1.45 |
| PTGS1(07) rs4836887                         | 0.13  | 0.07           | 0.77                         | 0.58 - 1.03 | 0.66            | 1.10                         | 0.72 - 1.68 |
| PTGS1(08) rs10306108                        | 0.07  | 0.83           | 1.04                         | 0.74 - 1.46 | 0.50            | 1.18                         | 0.74 - 1.88 |
| PTGS1(15) rs10306146                        | 0.13  | 0.08           | 0.77                         | 0.58 - 1.04 | 0.98            | 1.01                         | 0.65 - 1.57 |
| PTGS2                                       |       |                |                              |             |                 |                              |             |
| PTGS2(01) rs4648310                         | 0.04  | 0.50           | 1.18                         | 0.74 - 1.86 | 0.33            | 0.59                         | 0.19 - 1.85 |
| PTGS2(02) rs689467                          | 0.07  | 0.43           | 0.87                         | 0.62 - 1.23 | 0.86            | 1.05                         | 0.58 - 1.92 |
| PTGS2(03) rs2206593                         | 0.05  | 0.32           | 1.20                         | 0.85 - 1.69 | 0.94            | 0.98                         | 0.56 - 1.72 |
| PTGS2(04) rs5275                            | 0.34  | 0.86           | 1.02                         | 0.85 - 1.22 | 0.36            | 1.15                         | 0.86 - 1.54 |
| PTGS2(09) rs5277                            | 0.16  | 0.22           | 1.16                         | 0.92 - 1.47 | 0.15            | 0.74                         | 0.48 - 1.14 |
| ††PTGS2(11) rs20424 (set 1 & 2 combined)    | 0.02  | 0.47           | 0.8                          | 0.44 - 1.46 | 0.37            | 0.64                         | 0.24 - 1.71 |
| PTGS2(17) rs4648276                         | 0.12  | 0.12           | 1.22                         | 0.95 - 1.57 | 0.25            | 1.26                         | 0.86 - 1.85 |
| PGDS                                        |       |                |                              |             |                 |                              |             |
| PGDS(02) rs10516950                         | 0.44  | 0.89           | 0.99                         | 0.82 - 1.18 | 0.17            | 1.21                         | 0.92 - 1.58 |
| PGDS(03) rs1045435                          | 0.39  | 0.67           | 0.96                         | 0.80 - 1.15 | 0.62            | 1.07                         | 0.82 - 1.41 |
| TBXAS1                                      |       |                |                              |             |                 |                              |             |
| TBXAS1(01) rs6971207                        | 0.01  | 0.33           | 1.36                         | 0.76 - 2.41 | 0.05            | 0                            | 0.00 - E    |
| ††TBXAS1(02) rs2267681 (set 1 & 2 combined) | 0.42  | 0.06           | 1.13                         | 0.99 - 1.29 | 0.77            | 0.97                         | 0.78 - 1.20 |
| TBXAS1(03) rs7810415                        | 0.48  | 0.82           | 0.98                         | 0.82 - 1.17 | 0.76            | 1.04                         | 0.79 - 1.38 |
| TBXAS1(04) rs3779134                        | 0.12  | 0.19           | 1.19                         | 0.93 - 1.52 | 0.35            | 0.8                          | 0.50 - 1.28 |
| TBXAS1(05) rs194149                         | 0.28  | 0.11           | 1.17                         | 0.97 - 1.42 | 0.5             | 0.9                          | 0.65 - 1.23 |
| TBXAS1(08) rs11973494                       | 0.22  | 0.07           | 1.22                         | 0.99 - 1.50 | 0.67            | 0.93                         | 0.67 - 1.30 |
| TBXAS1(09) rs2284205                        | 0.16  | 0.07           | 1.24                         | 0.98 - 1.57 | 0.6             | 0.9                          | 0.61 - 1.33 |

| †Gene/SNP             | MAF** | <u>INCIDENT CASES</u> |                              | <u>PREVALENT CASES</u> |                              | P-trend | Hazard ratio (HR) Per Allele | 95% CI** |
|-----------------------|-------|-----------------------|------------------------------|------------------------|------------------------------|---------|------------------------------|----------|
|                       |       | P-trend               | Hazard ratio (HR) Per Allele | P-trend                | Hazard ratio (HR) Per Allele |         |                              |          |
| TBXAS1(11) rs2107901  | 0.17  | 0.96                  | 1.01                         | 0.79 - 1.28            | 0.07                         | 1.39    | 0.99 - 1.94                  |          |
| TBXAS1(12) rs10487665 | 0.09  | 0.22                  | 1.20                         | 0.90 - 1.61            | 0.34                         | 0.77    | 0.45 - 1.34                  |          |
| TBXAS1(13) rs2190087  | 0.23  | 0.84                  | 1.02                         | 0.83 - 1.26            | 0.56                         | 1.1     | 0.80 - 1.51                  |          |
| TBXAS1(14) rs1557967  | 0.2   | 0.49                  | 1.08                         | 0.87 - 1.34            | 0.27                         | 0.82    | 0.57 - 1.18                  |          |
| TBXAS1(15) rs1003816  | 0.1   | 0.84                  | 1.03                         | 0.78 - 1.37            | 0.87                         | 1.03    | 0.68 - 1.57                  |          |
| TBXAS1(16) rs41728    | 0.12  | 0.83                  | 1.03                         | 0.79 - 1.34            | 0.58                         | 1.12    | 0.75 - 1.67                  |          |
| TBXAS1(17) rs41727    | 0.1   | 0.75                  | 1.05                         | 0.79 - 1.39            | 0.98                         | 1       | 0.64 - 1.55                  |          |
| TBXAS1(20) rs2267701  | 0.14  | 0.66                  | 1.06                         | 0.82 - 1.36            | 0.59                         | 0.89    | 0.59 - 1.35                  |          |
| TBXAS1(21) rs740150   | 0.19  | 0.84                  | 0.98                         | 0.78 - 1.22            | 0.45                         | 0.87    | 0.59 - 1.26                  |          |
| TBXAS1(23) rs10487667 | 0.25  | 0.18                  | 1.15                         | 0.94 - 1.39            | 0.61                         | 0.92    | 0.67 - 1.27                  |          |
| TBXAS1(25) rs2267706  | 0.23  | 0.86                  | 1.02                         | 0.83 - 1.25            | 0.86                         | 1.03    | 0.73 - 1.45                  |          |
| TBXAS1(28) rs22861987 | 0.38  | 0.13                  | 1.16                         | 0.96 - 1.39            | 0.79                         | 1.04    | 0.78 - 1.39                  |          |
| TBXAS1(29) rs2286196  | 0.19  | 0.26                  | 1.13                         | 0.91 - 1.40            | 0.73                         | 0.93    | 0.64 - 1.37                  |          |
| TBXAS1(30) rs2267692  | 0.35  | 0.12                  | 1.16                         | 0.97 - 1.38            | 0.87                         | 1.02    | 0.77 - 1.36                  |          |
| TBXAS1(31) rs1015572  | 0.05  | 0.63                  | 1.11                         | 0.73 - 1.68            | 0.62                         | 0.85    | 0.43 - 1.66                  |          |
| TBXAS1(32) rs1015570  | 0.39  | 0.62                  | 0.95                         | 0.79 - 1.15            | 0.64                         | 0.94    | 0.71 - 1.24                  |          |
| TBXAS1(37) rs2299887  | 0.4   | 0.93                  | 0.99                         | 0.83 - 1.19            | 0.63                         | 0.93    | 0.70 - 1.24                  |          |
| TBXAS1(38) rs10544451 | 0.24  | 0.71                  | 1.04                         | 0.85 - 1.28            | 0.46                         | 1.13    | 0.82 - 1.54                  |          |

†All genes assessed in set1 (cases=2270 and controls=2280) only unless P</= 0.05 for either P-trend or P-heterogeneity in original analysis.

††Results shown are combined set 1 and 2 data (cases=4470 and controls=4560).

\* The values for these SNPs are absent due to their low frequency.

\*\*Abbreviations: MAF - Minor Allele Frequency; 95%CI - 95% Confidence Interval.
